# Supplementary material
Source: publisher site journal article supplement (https://www.dovepress.com/article/455964)
Supplement: Supplementary file 1 [file get_supplementary_file.php]

**Vascular Catheter-associated Infections Knowledge Questionnaire**

Note: All items are single-choice questions, and the correct answers are in ***bold italics and underlined.***

# Dimension 1: Concept of vascular catheter-associated infections

## 1.1 Definition

1. **What is the definition of vascular catheter-associated infections?**
2. ***Primary infection that occurs during the indwelling vascular catheter and within 48 hours after removal of the vascular catheter and is not related to infection at other sites.***
3. Primary infection that occurs during the indwelling vascular catheter and within 24 hours after removal of the vascular catheter and is not related to infection at other sites.
4. Primary infection that occurs during the indwelling vascular catheter and within 12 hours after removal of the vascular catheter and is not related to infection at other sites.
5. Primary infection that occurs during the indwelling vascular catheter and within 36 hours after removal of the vascular catheter and is not related to infection at other sites.
6. Primary infection that occurs during the indwelling vascular catheter and within 72 hours after removal of the vascular catheter and is not related to infection at other sites.

## 1.2 Clinical manifestations

1. **What are the classifications of Vascular catheter-associated infections?**
2. ***Vascular catheter-associated local infections and bloodstream infections***
3. Vascular catheter-associated puncture point infections and bloodstream infections
4. Vascular catheter-associated tunnel infections and puncture point infections
5. Vascular catheter-associated tunnel infections and bloodstream infections
6. Vascular catheter-associated tunnel infections and local infections
7. **Which of the following are the clinical manifestations of vascular catheter-associated infections?**
8. ***Local inflammatory manifestations such as redness, swelling, heat, pain, and exudation, and systemic manifestations such as fever (>38°C), chills, and hypotension and other systemic manifestations***
9. Local inflammatory manifestations such as redness, swelling, heat, pain, and exudation, and systemic manifestations such as fever (>38.5°C), chills, hypotension and other systemic manifestations
10. Local inflammatory manifestations such as redness, swelling, heat, pain, and exudation, and systemic manifestations such as fever (≥38.5°C), chills, and hypotension and other systemic manifestations
11. Local inflammatory manifestations such as redness, swelling, heat, pain, and exudation, and systemic manifestations such as fever (≥38°C), chills, and hypotension and other systemic manifestations
12. Local inflammatory manifestations such as redness, swelling, heat, pain, and exudation, and systemic manifestations such as fever (≥39°C), chills, and hypotension and other systemic manifestations

## 1.3 Clinical diagnosis

1. **Which of the following is incorrect regarding microbiological examination results for the diagnosis of central venous catheter-related bloodstream infections?**
2. Peripheral venous blood culture is positive for bacteria or fungi, or catheter tip and peripheral blood culture of the same species and the same susceptibility results of pathogenic bacteria
3. Peripheral venous blood and catheter blood cultures show the same bacteria, and the catheter blood reports positive is 120 minutes faster than the peripheral blood
4. Peripheral venous blood and catheter blood cultured the same bacteria; the concentration of bacteria in catheter blood is five times higher than that in peripheral blood
5. Negative cultures in both peripheral venous blood and catheter blood can rule out catheter-related bloodstream infection
6. ***Negative peripheral blood culture and positive bacterial culture at the catheter tip can diagnose catheter-related bloodstream infection***
7. **Which item is wrong in the description of the blood culture collection specification?**
8. At least two sets of blood culture specimens should be taken at the same time, and two sets of blood should be drawn in the same way within 24 hours
9. For patients who retain the catheter, one share of peripheral venous blood and one share of catheter blood are collected
10. For patients with catheter removal, two sets of blood were collected from independent peripheral veins, and the catheter tip was cut 5 cm under sterile conditions for culture
11. ***The blood collection volume is 10 ml per bottle, which should be sent for testing immediately and placed at room temperature for no more than 24 hours***
12. The blood collection volume is 10 ml per bottle, which should be sent for testing immediately and placed at room temperature for no more than 12 hours

# Dimension 2: Causes of vascular catheter-associated infections

## 2.1 Infection routes

1. **Which of the following is the infection route of vascular catheter-associated infections?**
2. During catheterization, the hand contaminates the skin and catheterization material of the puncture site
3. Bacteria at the puncture site migrate to the subcutaneous catheter
4. Contamination of infusion sets and auxiliary devices
5. Contamination of the catheter interface site
6. ***All of the above***

## 2.2 Risk factors

1. **Which of the following is not the risk factor for vascular catheter-associated infections?**
2. Catheter site, indwelling time
3. Specification of the operator's catheterization and maintenance operation
4. ***Operator's gender, age, immunity***
5. Patient's age, immunity, treatment regimen
6. Catheter type and number of catheter lumen

## 2.3 Pathogens

**(1) Which of the following is the common pathogen of vascular catheter-associated infections?**

1. Bacillus, Corynebacterium spp., and Enterococci
2. Candida, Candida spp.
3. Coagulase-negative staphylococcus, Staphylococcus aureus
4. Fusarium, Trichophyton
5. ***All of the above***

# Dimension 3: Prevention and treatment measures for vascular catheter-associated infections

## 3.1 Before catheter placement

1. **Regarding measures to prevent vascular catheter-associated infections before catheter placement, which is incorrect?**
2. Strictly grasp the indications for catheterization and reduce unnecessary catheterization
3. Carefully assess the patient's general condition and puncture site
4. ***Medical staff with respiratory infections should wear masks when catheterization***
5. Dressings, catheters, etc., that come into contact with patients should be kept sterile
6. Catheter placement for patients with poor vascular conditions, ultrasound-guided puncture can be used
7. **Which of the following is the preferred central venous catheter insertion site for adults?**
8. internal jugular vein
9. ***Subclavian vein***
10. Supraclavian vein
11. femoral vein
12. brachial vein
13. **Which of the following is the first choice recommended for the central venous indwelling site when conducting continuous renal replacement therapy?**
14. femoral vein
15. Subclavian vein
16. ***Internal jugular vein***
17. Supraclavicular vein
18. humeral vein

## 3.2 During the process of catheter placement

1. **Which is not a prevention measure for vascular catheter-associated infections during the process of catheter placement?**
2. Compliance with the maximum sterile barrier requirement
3. Disinfect with skin disinfectant that complies with national regulations
4. Gloves should be replaced immediately when they are contaminated or damaged
5. ***Regularly change the dressing covered by the catheter puncture point***
6. Implantation and removal of the port should be performed in the operating room
7. **With regard to skin disinfection, which description is incorrect?**
8. Disinfectant solution containing chlorhexidine concentration > 0.5% is recommended
9. Disinfect the skin at least two times or refer to the product leaflet
10. The vein can be punctured only after the disinfectant solution is naturally dried
11. ***Wipe and disinfect with the puncture point as the center and the diameter of the central venous catheter disinfection ≥ 10cm***
12. Wipe and disinfect with the puncture point as the center and the diameter of central venous catheter disinfection ≥ 20cm
13. **In the following guidelines for catheter fixation, which description is incorrect?**
14. Sterile transparent dressing is preferred
15. Cover the puncture site with the puncture point as the center
16. Sterile transparent dressings are tension-free fixation
17. The dressing is marked with the date of puncture
18. ***Sterile transparent dressings are preferred, and hydrocolloid dressings can be used in patients with puncture site infection and allergies***

## 3.3 After catheter placement

1. **Regarding the dressing change guidelines, which description is incorrect?**
2. Hand hygiene should be strictly performed
3. Pay attention to the patient's complaints and assess the local signs of infection
4. Patients with skin lesions and allergies should use gauze dressings
5. ***The gauze dressing should be changed weekly, and when the curling edge is wet, it should be changed in time***
6. Transparent dressing should be changed weekly, and when the curling edge is wet, it should be replaced in time
7. **Regarding sterilization of infusion connectors, which description is wrong?**
8. Alcohol swabs are preferred
9. The infusion connectors can be connected only after the disinfectant solution is naturally dried
10. Wipe the cross-section and periphery of the joint vigorously for 5~15 seconds
11. Use alcohol-containing connector sterilization caps for sterilization; one-time use
12. ***Use antimicrobial-coated fittings to prevent catheter bloodstream infections***
13. **Regarding the infusion connector replacement, which description is incorrect?**
14. It should be replaced at least once every seven days
15. It should be replaced if there is blood or drug residue
16. It should be replaced when it is suspected of contamination, damage, or disconnection
17. ***After the infusion connector is disconnected, sterilize it and reuse it***
18. The infusion connector should be replaced after collecting blood through the catheter
19. **The infusion set should be replaced regularly, which of the following is incorrect?**
20. It should be replaced after 24 hours of infusion
21. The blood transfusion set for whole and component should be replaced every 4 hours
22. When infusion of fat emulsion alone, the infusion set should be changed every 12 hours
23. After stopping the infusion, the infusion set should be replaced
24. ***The blood transfusion sets for whole blood and component blood should be replaced every 12 hours***
25. **Regarding flushing and sealing tubes, which description is incorrect?**
26. It should be flushed with a single dose of normal saline without preservatives
27. It should be sealed with normal saline or 0~10U/ml heparin solution
28. Use pulse technology to seal the tube, i.e., the "push-stop-push" method
29. The sealing solution should be used by one person, one needle, one tube, one dose
30. ***Flush the tube at least every seven days during the intermittent period***
31. **Which of the following statement about antibiotic flushing solution is incorrect?**
32. Antibiotic flushing solution can be used in the presence of catheter-associated infections
33. Prophylactic antibiotic flushing can be used in patients with a high incidence of **vascular catheter-associated infections**
34. Antibiotic flushing solution should not be used for routine prophylaxis
35. ***The antibiotic flushing solution in the catheter can be flushed into the blood vessel before infusion***
36. The antibiotic flushing solution in the catheter should be withdrawn and discarded before infusion
37. **Regarding the port maintenance specification, which is correct?**
38. ***The non-traumatic needle should be changed at least every seven days***
39. The port should be maintained at least weekly during the treatment interval
40. The port should be flushed at least once a week during the treatment interval
41. The small gauze under the wing of the non-invasive needle should be changed every other day
42. Needles should be changed at least once a day
43. **Regarding catheter replacement in primary situ, which of the following is correct?**
44. When there is suspicion of infection in a non-tunneled catheter, carefully disinfect the catheter when using guidewire to replace the catheter
45. ***Non-tunneled catheters can be replaced with guidewire guidance when there is no obvious evidence of infection***
46. Tunneled catheters can be replaced with guidewire guidance when there is no obvious evidence of infection
47. When there is a suspicion of infection in the tunnel catheter, the catheter should be replaced by a guidewire and should be carefully disinfected
48. When the infusion port is suspected of infection, the port should be replaced by a guidewire and should be carefully disinfected
49. **Regarding the indications for catheter removal, which is incorrect?**
50. Catheterization in an emergency should be removed as soon as possible within two days, if effective sterility cannot be guaranteed
51. The umbilical vein catheter should not be placed for more than 14 days and should be removed in time when it is not needed
52. When vascular catheter-associated infections are suspected, a comprehensive evaluation should be made to decide whether to extubate
53. ***To prevent vascular catheter-associated infections, central venous catheters should be replaced regularly***
54. The pressure sensor should be used according to the product manual or replaced every four days

# Dimension 4: Management measures of vascular catheter-associated infections

1. **Which is not the management requirement for preventing vascular catheter-associated infections?**
2. Rules and regulations for the prevention of vascular catheter-associated infections should be improved
3. The development and implementation of norms and procedures for the prevention and control of vascular catheter-associated infections
4. Clarify the responsibilities of relevant responsible departments and personnel
5. Practitioners and nurses who carry out the indwelling, maintenance, and use of vascular catheters should have undergone corresponding technical training
6. ***The environment for central venous catheter placement should meet the requirements of a Class III environment in medical institutions***
7. **Regarding the following strategies for preventing and controlling infection associated with umbilical vascular catheters, which is incorrect?**
8. The umbilical cord should be cleaned and disinfected before intubation
9. Topical antimicrobial ointment should not be used in umbilical vascular catheters
10. ***In the event of umbilical vascular catheter-associated infections, the catheter should be replaced promptly***
11. When the umbilical vascular catheter fails, the catheter should be replaced in time
12. Use low-dose heparin for continuous infusion of umbilical artery catheter to prevent catheter occlusion
